# Supplementary material for: Different chromatin interfaces of the Drosophila dosage compensation complex revealed by high-shear ChIP-seq
Source: HighWire-hosted journal article supplement (doi:10.1101/gr.146407.112), 2012-12-11
Supplement: Supplemental_Material_and_Legends.docx [file Supplemental_Material_and_Legends.docx]

Supplementary methods

Classification of active genes

We exploited a published microarray expression profile in *Drosophila* S2 cells (GSE11164) for defining active genes. On the control arrays reflecting the wildtype expression patterns we called "absent" and "present" genes using the MAS algorithm (*affy* package in R). We defined genes as being active if they were not called "absent" in any of the three biological replicates.

Cumulative profile plots at transcription start and termination sites as well as high affinity binding sites of the MSL-DCC

Coverage vectors of the ChIP profiles were aligned at the indicated genomic features. In a window of indicated size surrounding the feature we calculated per base pair the average as well as the 25th and 75th percentile of enrichments. For TSS/TTS alignments we used the 5' and 3' ends of the gadfly "gene" annotations as reference points and did not consider alternative transcription start sites.

Cumulative profile plots of MSL3 on scaled genes

Each gene instance in the indicated set was cut into 500 non-overlapping consecutive bins. For each bin we determined the average MSL3 enrichment. We subsequently summarized across all genes the grand mean and the interquartile range for the corresponding bins.

Peak mapping to genomic features

Peak summits were annotated based on the gadfly release 537 GFF file (flybase.org). CDS, UTR and intron mappings were defined by perfect match to the annotation features "intron", "exon", "CDS". Promoter association was assigned to peaks mapping within 200 bp upstream of annotated transcription start sites. Peaks mapping to any other genomic location were considered intergenic. In case peak centers were located within a high-affinity binding site as determined by peak calling on the combined MSL2 and MLE data we considered the peaks mapping to HAS overriding any other assignment.

Fragment size determination at specific genomic loci

Using paired-end sequencing data we calculated for each genomic position and each ChIP-target the average size of the covering ChIP fragments. We then summarized on selected genomic features the grand mean of the fragment sizes as well as the 95% confidence interval.

Feature correlation

Gene bodies were defined ranging from gene start to gene end as provided by the gadfly annotation. Promoters were defined as the 200 bp upstream regions of genes. Compensated gene expression was defined as the inverse of log fold change in gene expression upon MSL2 RNAi (Hamada et al. 2005).

Sequence motif enrichment analysis on high-affinity sites

We searched for enriched sequence motifs in 200 bp windows surrounding the HAS peak centers using MEME (http://meme.nbcr.net/meme/). Parameters were -revcomp -mod anr -nmotifs 20 -minwin 5 -maxwin 40 -evt 0.01.

Immuno-FISH

Immuno-FISH on Drosophila S2 cells was performed as described in (Lanzuolo et al. 2007) with the following modifications: 5*10e5 cells were placed for 1h on an 18x18 mm coverslip (Precision cover slips LH22.1, Roth Labware) without poly-L-lysine, fixed for 10 min in 4% freshly-prepared formaldehyde/PBS solution on ice, and permeabilized for 7,5 min in 1% formaldeyhde/0,25% Triton/PBS on ice. Cells were made competent for FISH without the addition of the RNAse digest step. FISH probes were generated by nick translation incorporating dUTP-DIG, dUTP-biotin or dUTP-DNP of PCR-fragment derived genomic loci of interest, yielding 1 to 1.5 kb fragments covering a genomic locus of 10 to 20 kb. Primer sequences for the individual probes are available upon request.

Supplementary figure legends

**Supplementary Figure S1.** Bioanalyzer (Agilent) traces ofchromatin size distributions obtained using different shearing technologies: (A) Bioruptor low-shear, 500 bp Bioruptor high-shear (B), and the corresponding agarose gel picture (C). 200 bp Covaris high-shear (D), 180 bp Covaris low-shear, 800 bp (E), and the corresponding agarose gel picture (F). (G) MSL protein levels in ChIP chromatin under different Covaris sonication conditions. Western blot of indicated MSL proteins after crosslink reversal of untreated (input) and sheared chromatin.

**Supplementary Figure S2.** Average enrichment of roX2 RNA along active genes on the X (red line, n=1113) and the autosomes (black line, n=5341). Shaded areas above and below the solid lines describe the interquartile range of enrichment.

**Supplementary Figure S3**. (A) Correlation scatter plot of MLE and MSL-2 ChIP-seq enrichments on the X. Depicted are average enrichment values in non-overlapping 500 bp bins. Red dots reflect unfiltered data, grey dots correspond to enrichment calculations in which the HAS signals have been masked. The solid lines represent the regression lines of the two variables. The corresponding Pearson correlation coefficients are provided. (B) Genome-wide overlap of 633 MLE and 223 MSL-2 peaks. Overlap-window: 300 bp. (C) Overlap of X chromosomal HAS according to old (n=130) and new (n=231) definition (D) Overlap of X-chromosomal genes based on their activity status and whether or not they are HAS target genes. Activity status was derived from Affymetrix expression data (GSE11164) (E) Relative localization of HAS within target genes (n=164). Only peaks that map to a single gene were taken into consideration. (F) Top enriched motif in HAS peak regions (E-value 9.8e-197). (G) Motif occurrence in all HAS peak regions. (H) MSL-DCC features at the roX2 locus.

**Supplementary Figure S4**. Chromosomal distribution of (A) ChIP-seq and (B) ChIP-chip enrichment signals for the indicated MSL complex features. The color of each vertical line represents the maximum enrichment signal within a 20kb window. The color scales linearly from white (30% quantile) to dark red (99.9% quantile) in each plot. For sake of clarity, signals from heterochromatic arms have been omitted. Please note that the layout of the tiling microarray covers only parts of the autosomal chromosomes.

**Supplementary Figure S5**. (A) Immuno-FISH in *Drosophila* S2 cells. (B) ChIP-seq enrichment signals on the FISH locus around *mtRNApol* (C) Quantification of signals of MOF, MSL-1, MSL-3 and MLE on the FISH locus. Signal is expressed as a ratio of fluorescence intensity within the FISH signal on the average autosomal signal. (n=6). D) Overlap of MSL-1 and NSL1 peaks on promoters. NSL1 peaks were derived from a mapping study in salivary glands (GSE25709).

**Supplementary Figure S6**. A) Distribution of MSL-1, MOF, MSL-3 and H4K16ac on X-chromosomal active genes. Genes were grouped in equally sized bins (n=223) by increasing distance from HAS. The closer the genes are to HAS the darker the red of the average signal. Signals on HAS have been masked for this analysis. B) Distribution of MSL-1, MOF, MSL-3 and H4K16ac on X-chromosomal active genes. Genes were grouped in equally sized bins (n=223) by increasing compensation as evaluated by Affymetrix expression profiling comparing MSL-2 RNAi to control cell lines (Hamada et al. 2005). The stronger the genes are compensated the darker the red of the average signal. Signals on HAS have been masked for this analysis. C) Distribution of serine 5-phosphorylated RNA Polymerase II along active genes on the autosomes (top panel) and the X-chromosome (bottom panel). Signals of genes with an MSL-1 peak within the promoter (n=1180 on autosomes, n=361 on the X) have been averaged to the red line, genes without an MSL-1 peak (n=4161 on autosomes, n=752 on the X) to a blue line. Shaded areas above and below the solid lines describe the interquartile range of enrichment.

Supplementary references

Hamada FN, Park PJ, Gordadze PR, Kuroda MI. 2005. Global regulation of X chromosomal genes by the MSL complex in Drosophila melanogaster. *Genes Dev* **19**: 2289–2294.

Lanzuolo C, Roure V, Dekker J, Bantignies F, Orlando V. 2007. Polycomb response elements mediate the formation of chromosome higher-order structures in the bithorax complex. *Nat Cell Biol* **9**: 1167–1174.
