# Supplementary material for: Different chromatin interfaces of the Drosophila dosage compensation complex revealed by high-shear ChIP-seq
Source: HighWire-hosted journal article supplement (doi:10.1101/gr.146407.112), 2012-12-11
Supplement: Supplemental_Table_1.docx [file Supplemental_Table_1.docx]

**Supplementary table 1**: ChIPSeq sample description

| **Sample** | **chromatin size (bp)** | **shearing tech** | **read mode** | **read length (bases)** | **calc. fragment size (bases)** | **read extension (bases)** | **true frag. size (bp)** | **mapped reads/ fragments** | **Antibody** |
| --- | --- | --- | --- | --- | --- | --- | --- | --- | --- |
| MSL-1, replicate 1 | 200 | Bioruptor | single read | 38 | 93 | 120 |  | 21,757,675 | polyclonal rabbit MSL-1, crude serum |
| MSL-1, replicate 2 | 180 | Covaris | paired end | 100 | 110 |  | 178 | 37,067,917 | polyclonal rabbit MSL-1, crude serum |
| MSL-2, replicate 1 | 500 | Bioruptor | single read | 32 | 167 | 165 |  | 5,331,502 | polyclonal rabbit MSL-2, crude serum |
| MSL-2, replicate 2 | 200 | Bioruptor | single read | 36 | 67 | 100 |  | 34,454,168 | polyclonal rabbit MSL-2, crude serum |
| MSL-2, replicate 3 | 180 | Covaris | paired end | 100 | 105 |  | 171 | 48,718,604 | polyclonal rabbit MSL-2, crude serum |
| MSL-3, replicate 1 | 200 | Bioruptor | single read | 38 | 118 | 120 |  | 25,301,121 | polyclonal rabbit MSL-3 R74, crude serum |
| MSL-3, replicate 2 | 180 | Covaris | paired end | 100 | 100 |  | 174 | 59,854,314 | polyclonal rabbit MSL-3 R74, crude serum |
| MOF, replicate 1 | 200 | Bioruptor | single read | 38 | 109 | 120 |  | 22,676,726 | polyclonal rabbit MOF SA 4897, crude serum |
| MOF, replicate 2 | 180 | Covaris | paired end | 100 | 130 |  | 182 | 37,992,353 | polyclonal rabbit MOF SA 4897, crude serum |
| MLE, replicate 1 | 200 | Bioruptor | single read | 38 | 101 | 120 |  | 21,643,841 | monoclonal rat MLE 6E11 |
| MLE, replicate 1 | 180 | Covaris | paired end | 100 | 110 |  | 173 | 39,793,236 | monoclonal rat MLE 6E11 |
| H4K16ac | 200 | Bioruptor | single read | 38 | 165 | 120 |  | 21,216,621 | polyclonal rabbit H4K16ac, Active Motif 39167 |
| Pol S5p | 200 | Bioruptor | single read | 50 | 127 | 130 |  | 14,544,360 | monoclonal rat Pol S5p 3E8 |
| Input, replicate 1 | 500 | Bioruptor | single read | 32 | 136 | 165 |  | 5,498,117 |  |
| Input, replicate 2 | 200 | Bioruptor | single read | 36 | 74 | 100 |  | 34,053,287 |  |
| Input, replicate 3 | 200 | Bioruptor | single read | 50 | 129 | 130 |  | 11,090,409 |  |
| Input, replicate 4 | 180 | Covaris | paired end | 100 | 110 |  | 178 | 56,640,994 |  |
