# Supplementary material for: Different chromatin interfaces of the Drosophila dosage compensation complex revealed by high-shear ChIP-seq
Source: HighWire-hosted journal article supplement (doi:10.1101/gr.146407.112), 2012-12-11
Supplement: Supplemental_Table_2.docx [file Supplemental_Table_2.docx]

**Supplementary table 2**: qPCR primer sequences

| **amplicon** | **forward primer** | **reverse primer** | **location** |
| --- | --- | --- | --- |
| 1 | tgtggggaagaaagcagaaa | tcgaattgcctttatgaacga | unbound |
| 2 | gtggcttttccgttgtcct | agcaggccgaattcgttt |  |
| 3 | taccacagactgagcgagga | agtgttgccaagcgagattt | promoter peak |
| 4 | ctttccgcgttgggaaatac | ctgtccggaatcctgatcct |  |
| 5 | gcacccaaagaggaacaaca | actcaacgaaaccggacaca |  |
| 6 | atctcgcggtacatcaacca | cacgctgaagaaaccaatgc |  |
| 7 | gcaccagaaatcgaacctga | cctaggggtcgaatgtgctt |  |
| 8 | gcgtacagtagctgagagctg | gcgcctttactgcatgttag | high affinity site |
| 9 | gaaaaccccgagatttgcat | gaaaaccccgagatttgcat |  |
